# Supplementary material
Source: publisher figshare collection journal article supplement (https://sage.figshare.com/ndownloader/files/15034697)
Supplement: Supplementary file 1 [file 15034697]

Supplementary table 1. Clinical characteristics of HCC patients and healthy controls.

|  | Test set for iTRAQ | | Validation set for ELISA | |
| --- | --- | --- | --- | --- |
|  | HCC(n=15) | Control(n=15) | HCC(n=14) | Control(n=14) |
| Age(years) | 54.13±9.49 | 50.45±12.23 | 61.64±9.40 | 53.8±11.25 |
| Gender(M/F) |  |  |  |  |
| Male | 12 | 8 | 9 | 7 |
| Female | 3 | 7 | 5 | 7 |
| Ethnicity |  |  |  |  |
| Chinese | 15 | 15 | 14 | 14 |
| HBVa or HCVb | 10 | 0 | 9 | 0 |

a:HBV, hepatitis B virus; b:HCV, hepatitis C virus
